# Supplementary material
Source: publisher figshare collection journal article supplement (https://gsapubs.figshare.com/ndownloader/files/35980784)

Petermann, H., Lyson, T.R., Miller, I.M., and Hagadorn, J.W., 2022, Crushed turtle shells: Proxies for lithification and burial depth histories: *Geosphere*, v. 18, <https://doi.org/10.1130/GES02513.1>

Comparison of lithification depths derived from plastron length and carapace length. Overall, both depth proxies are highly concordant ( $R = 0.91$ ) with only two marked exceptions (one *Adocus* and one *Hoplochelys*). However, carapace length for all three *Hoplochelys* appears to overestimate depth, hinting at a different interrelationship between carapace length, plastron length, and shell height that likely reflects a different evolutionary trajectory in shell construction.

# Comparison of Carapace and Plastron Depth

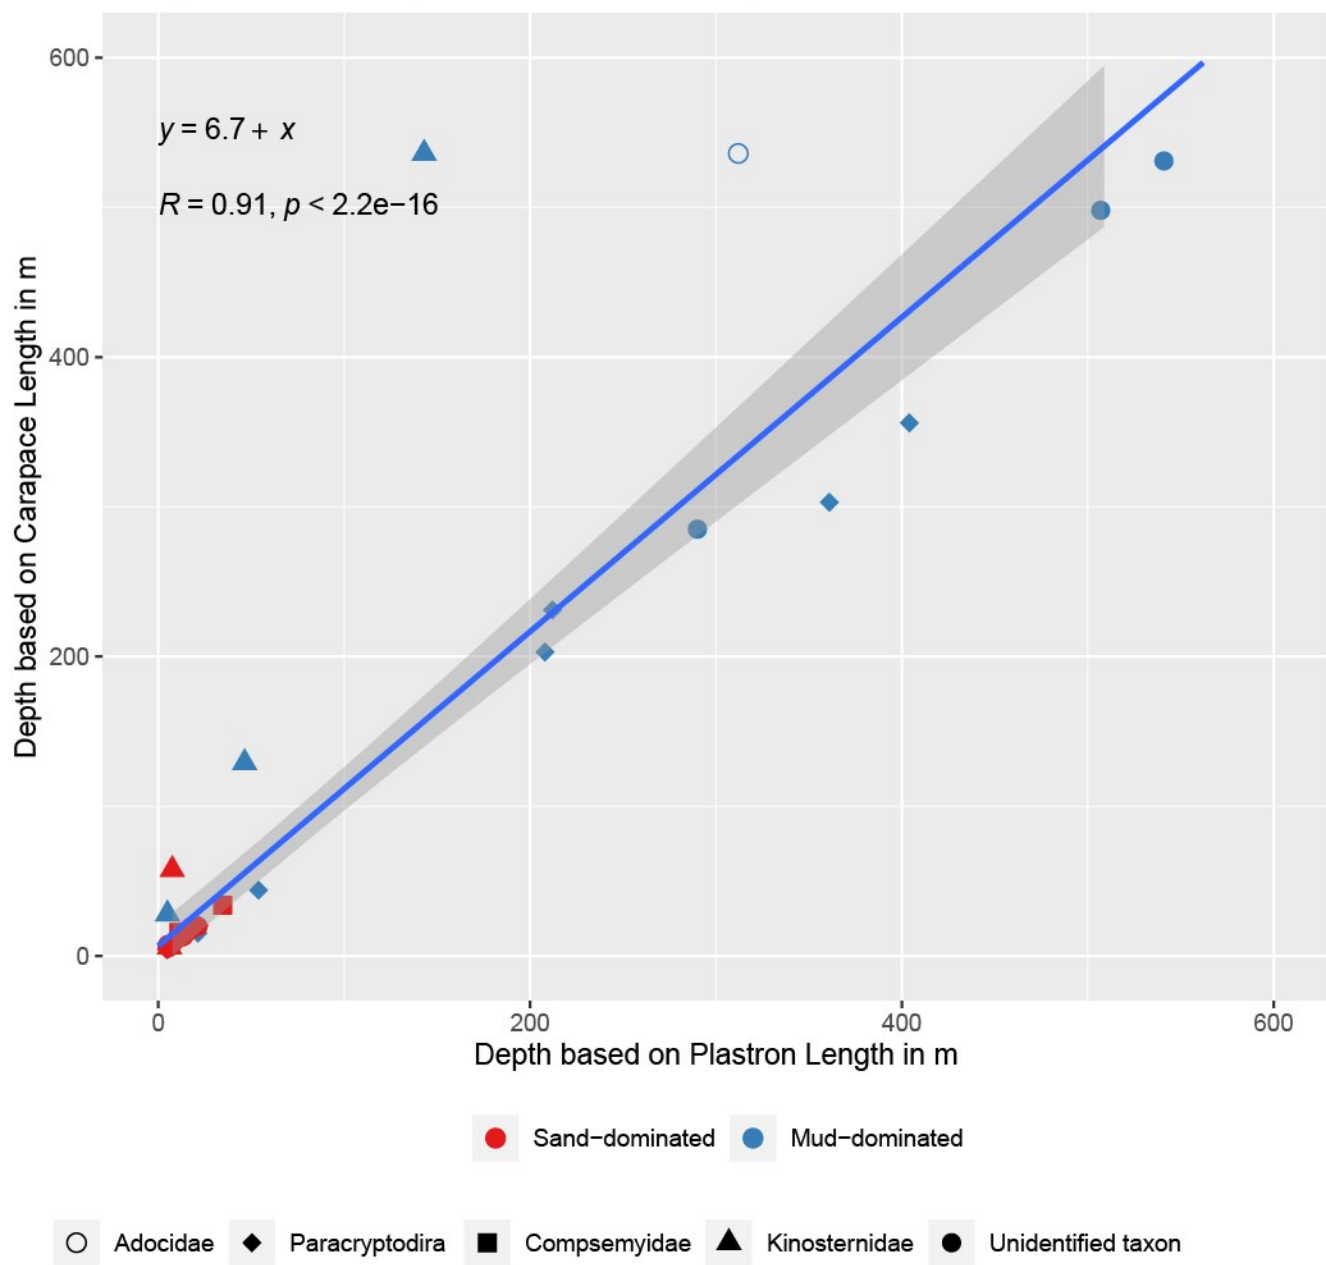

Supplement: Supplementary file 1 [file 35980784]
